## CORRECTION

# Plasma membrane-bound AGC3 kinases phosphorylate PIN auxin carriers at TPRXS(N/S) motifs to direct apical PIN recycling

Pankaj Dhonukshe<sup>1,\*</sup>, Fang Huang<sup>2,\*</sup>, Carlos S. Galvan-Ampudia<sup>2,\*</sup>, Ari Pekka Mähönen<sup>1,†</sup>, Jürgen Kleine-Vehn<sup>3,®</sup>, Jian Xu<sup>1,‡</sup>, Ab Quint<sup>2</sup>, Kalika Prasad<sup>1,£</sup>, Jiří Friml<sup>3,¥</sup>, Ben Scheres<sup>1,µ</sup> and Remko Offringa<sup>2,§</sup>

<sup>1</sup>Section of Molecular Genetics, Department of Biology, Utrecht University, Padualaan 8, 3584CH Utrecht, The Netherlands.

<sup>2</sup>Molecular and Developmental Genetics, Institute Biology Leiden, Leiden University, Sylvius Laboratory, Sylviusweg 72, 2333BE Leiden, The Netherlands.

<sup>3</sup>Department of Plant Systems Biology, Flanders Institute for Biotechnology, Technologiepark 927, 9052 Ghent, Belgium.

<sup>†</sup>These authors contributed equally to this work

<sup>µ</sup>No longer at this address

<sup>¶</sup>Present address: Institute of Integrative Biology, University of Liverpool, Crown Street, Liverpool L69 7ZB, UK.

<sup>§</sup>Present address: Plant Reproduction and Development, Ens de Lyon, 15 parvis René Descartes - BP 7000 69342 Lyon Cedex 07, France.

<sup>‡</sup>Present address: Institute of Biotechnology, University of Helsinki, P.O. Box 65, FIN-00014, Helsinki, Finland.

<sup>®</sup>Present address: Department of Applied Genetics and Cell Biology (DAGZ), Muthgasse 18, 1190 Wien, Austria.

<sup>‡</sup>Present address: Department of Biological Sciences, Faculty of Sciences, National University of Singapore, 14 Science Drive 4, Singapore 117543.

<sup>£</sup>Present address: School of Biology, Indian Institute of Science Education and Research, Thiruvananthapuram 695016, Kerala, India.

<sup>¥</sup>Present address: Institute of Science and Technology Austria (IST Austria), Am Campus 1, A-3400 Klosterneuburg, Austria.

<sup>µ</sup>Present address: Plant Developmental Biology, Wageningen University, Postbus 633, 6700AP Wageningen, The Netherlands.

<sup>§</sup>Author for correspondence (r.offringa@biology.leidenuniv.nl)

The authors informed us of problems related to Fig. 3C and Fig. 7D in *Development* **137**, 3245–3255. Both issues were noted by an investigation by the Technical Committee of Utrecht University (UTC) into this publication. Based on the findings provided (detailed below), the journal has decided that the major conclusions of the paper are not affected and that retraction is not required, but that a correction should be provided with an explanation of the circumstances. This course of action complies with our policy on correction of issues in the scientific record, which states: “Should an error appear in a published article that affects scientific meaning or author credibility but does not affect the overall results and conclusions of the paper, our policy is to publish a Correction”.

For Fig. 3C, the UTC concluded that it was the result of “cut-and-paste”, which is “not indicated by a solid line, nor is it mentioned in the figure legend, as prescribed by journal policy”. Fig. 3C presents results of *in vitro* phosphorylation of the different PIN2 hydrophilic loop (PIN2 HL) versions by the kinases PID, WAG1 and WAG2. The results were more or less similar for the three kinases (Fig. 3 revised version), and in order to reduce the figure size, it was decided that it would be sufficient to show the full data for the PINOID kinase, and to focus on the phosphorylation results for the wild-type version and the loss-of-phosphorylation version of the PIN2 HL for the WAG1 and WAG2 kinases. This involved splicing, and although the splicing is clearly visible in the original Fig. 3C, the appropriate presentation according to the standards of the journal would have been to leave space between the spliced parts. As demonstrated by the comparison between the revised Fig. 3 (below) and the original Fig. 3C, the spliced version represents part of the original data. In the revised version of Fig. 3 the full data set is shown and a more detailed description of the results is provided in the revised figure legend text.

With respect to Fig. 7D, the UTC noted that “it is not possible that random background noises, taken from two images, are identical. The most likely explanation is that the same green panel was used for the left and middle panel of Fig. 7D”. The original data were not available to the UTC, and this anomaly could not be resolved. *Development* also appointed its own independent expert to analyse the images, who concluded that “the two images are almost identical (except for the region purporting to show photoconversion) and it is highly unlikely that these could represent different time points. The analysis suggests that one of these images appears to have been generated by manipulating the other.” For this reason the authors and editors have seriously considered retraction of *Development* **137**, 3245–3255. However, the thorough analysis by the UTC and the *Development* editors identified no other abnormalities in the data. The authors and editors therefore feel that removing Fig. 7D and the related text from the publication provides the optimal solution for protecting the integrity of the scientific record.

According to the authors: “The main conclusion of the paper is that the AGC3 kinases PID, WAG1 and WAG2, and not other plant AGC kinases, instruct recruitment of PINs into the GNOM-independent apical recycling pathway by phosphorylating the middle serine in three conserved TPRXS(N/S) motifs. Based on data provided in *Development* **137**, 3245–3255 and also in other publications (Friml et al., 2004, *Science* **306**, 862–865; Michniewicz et al., 2007, *Cell* **130**, 1044–1056; Kleine-Vehn et al., 2008, *Curr. Biol.* **18**, 1–6; Kleine-Vehn et al., 2009, *Plant Cell* **21**, 3839–3849; Huang et al., 2010, *Plant Cell* **22**, 1129–1142), a model is proposed by which apolarly localized kinases phosphorylate PINs at the plasma membrane after PIN secretion, and trigger endocytosis-dependent PIN transcytosis (the trafficking of existing PIN cargo from one polar domain to another) to the apical domain. The objective of the photoconversion and time-lapse imaging experiments presented in Fig. 7D was merely to provide evidence for phosphorylation-triggered PIN transcytosis. PIN transcytosis was reported before by Kleine-Vehn et al. in 2008, *Curr. Biol.* **18**, 1–6; and in 2009, *Plant Cell* **21**, 3839–3849, and a role for PID in this process was also proposed, but not definitively demonstrated, in that latter paper.” Omission of Fig. 7D does not affect the main conclusions, and given that phosphorylation-triggered PIN transcytosis is only one minor aspect of the full paper, the editorial board of *Development* has

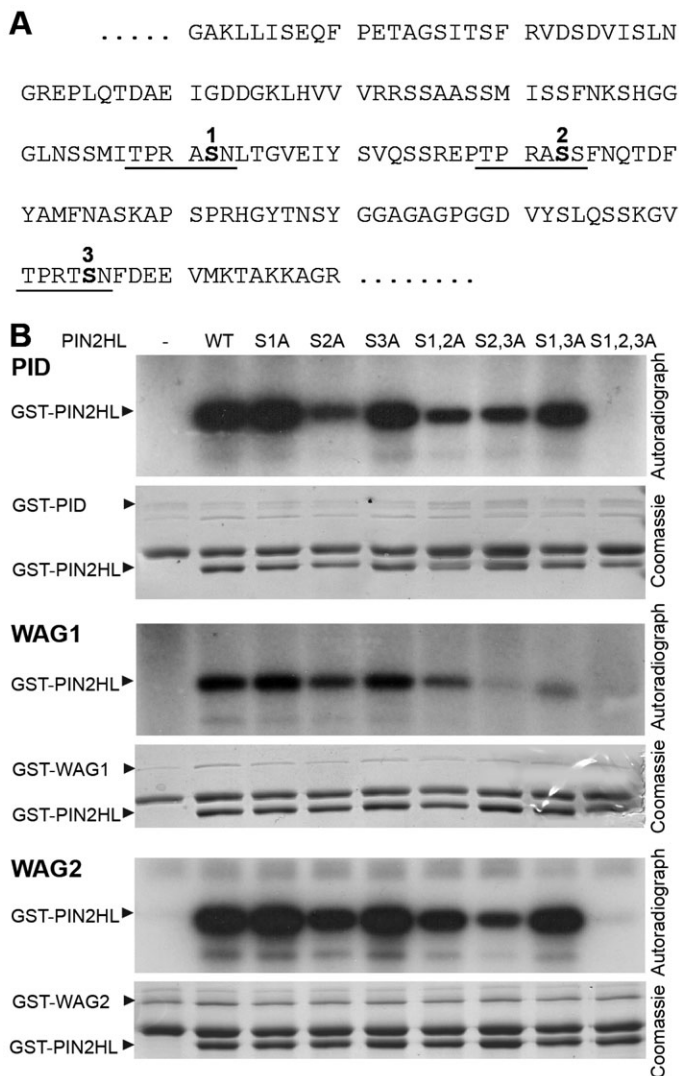

**Fig. 3 (Revised).** The central serines in three conserved TPRXS(N/S) motifs of the PIN2HL are the phosphorylation targets of PID, WAG1 and WAG2 kinases in vitro. (A) N-terminal part of the PIN2HL with the phosphoserines in the three TPRXS(N/S) motifs indicated. (B) GST-PIN2HL is phosphorylated by GST-PID and GST-WAG2, and also by GST-WAG1, albeit at lower levels. The results suggest that there are differences in the kinase activities and the contribution of the individual serines (S1, S2 and S3) in the phosphorylation of the PIN2HL by the kinases (e.g. replacing S2 for alanine seems to give the strongest reduction, whereas replacing S3 only leads to a significant reduction when combined with other substitutions), but the overall trend is that the phosphorylation is gradually reduced when one or two serines are replaced with alanines (indicated as S1A, S2A, S3A, S1,2A, S2,3A and S1,3A, respectively) and is completely abolished when all of the three serines are mutated to alanines (S1,2,3A).

decided that a correction suffices. The authors agree with this decision. The readers of *Development* **137**, 3245-3255 are therefore advised to ignore the data presented in Fig. 7D and the related text:

**P. 3251:** “Interestingly, upon reversal of PID induction (by washing out the induction medium), apically localized PIN2::PIN1-EosFP2 returned to the basal PM domain (Fig. 7D), indicating that constitutive PID action is required for maintaining apical PIN localization.”

**P. 3252,** legend Fig. 7: “Green-to-red photoconverted PIN2::PIN1-EosFP2 displays apical-to-basal relocation after estradiol washout (D).”

Pankaj Dhonukshe, the co-first and co-corresponding author of the original manuscript, is not listed as an author on this Correction upon his request. He provided us with the following statement, expressing his opinion:

“Pankaj Dhonukshe does not agree with the content of the Correction Notice as:

- the anomaly in the first green panel (before photoconversion) at Fig. 7D does not affect the published conclusion drawn from research findings. The conclusion is solely based and derived from separately acquired red panels shown in Fig. 7D. Deriving conclusions from only red panels is a standard practice.
- The anomaly at Fig. 7D does not affect the published conclusion. The current content related to Fig. 7D should therefore be revised, and not removed.
- For Fig. 3C, original data did not accurately support the published conclusion. As per the Correction Notice, original data not previously shown is included and new conclusions are derived from this data. Readers should be aware that original conclusions are therefore not accurately supported.”

We note that the affiliations of several authors have been updated in the author list above.

# Plasma membrane-bound AGC3 kinases phosphorylate PIN auxin carriers at TPRXS(N/S) motifs to direct apical PIN recycling

Pankaj Dhonukshe<sup>1,\*§</sup>, Fang Huang<sup>2,\*</sup>, Carlos S. Galvan-Ampudia<sup>2,\*</sup>, Ari Pekka Mähönen<sup>1,†</sup>, Jurgen Kleine-Vehn<sup>3</sup>, Jian Xu<sup>1,‡</sup>, Ab Quint<sup>2</sup>, Kalika Prasad<sup>1</sup>, Jiří Friml<sup>3</sup>, Ben Scheres<sup>1</sup> and Remko Offringa<sup>2,§</sup>

## SUMMARY

Polar membrane cargo delivery is crucial for establishing cell polarity and for directional transport processes. In plants, polar trafficking mediates the dynamic asymmetric distribution of PIN FORMED (PIN) carriers, which drive polar cell-to-cell transport of the hormone auxin, thereby generating auxin maxima and minima that control development. The *Arabidopsis* PINOID (PID) protein kinase instructs apical PIN localization by phosphorylating PINs. Here, we identified the PID homologs WAG1 and WAG2 as new PIN polarity regulators. We show that the AGC3 kinases PID, WAG1 and WAG2, and not other plant AGC kinases, instruct recruitment of PINs into the apical recycling pathway by phosphorylating the middle serine in three conserved TPRXS(N/S) motifs within the PIN central hydrophilic loop. Our results put forward a model by which apolarly localized PID, WAG1 and WAG2 phosphorylate PINs at the plasma membrane after default non-polar PIN secretion, and trigger endocytosis-dependent apical PIN recycling. This phosphorylation-triggered apical PIN recycling competes with ARF-GEF GNOM-dependent basal recycling to promote apical PIN localization. In planta, expression domains of PID, WAG1 and WAG2 correlate with apical localization of PINs in those cell types, indicating the importance of these kinases for apical PIN localization. Our data show that by directing polar PIN localization and PIN-mediated polar auxin transport, the three AGC3 kinases redundantly regulate cotyledon development, root meristem size and gravitropic response, indicating their involvement in both programmed and adaptive plant development.

**KEY WORDS:** Polar auxin transport, PIN efflux carrier, PID, WAG1, WAG2, Basal and apical recycling, Polar trafficking, Transcytosis, Endocytosis-related Rab5 pathway, *Arabidopsis*

## INTRODUCTION

The major plant signaling molecule auxin (indole-3-acetic acid or IAA) directs numerous developmental processes through its polar cell-to-cell transport-generated maxima and minima that regulate cell division, differentiation and growth. Polar auxin transport (PAT) involves at least three types of transporter proteins, of which the PIN-FORMED (PIN) auxin efflux carriers are key drivers as they determine the direction of transport through their asymmetric subcellular localization at the plasma membrane (PM) (Benjamins and Scheres, 2008; Sorefan et al., 2009; Tanaka et al., 2006).

Previously, the PINOID (PID) protein serine/threonine kinase has been identified as a regulator of PAT (Benjamins et al., 2001), and it was shown that PID is a PM-associated kinase that directs targeting of PIN proteins to the apical (shootward) side of the PM by phosphorylating these transporters in their large central

hydrophilic loop (PINHL) (Friml et al., 2004; Michniewicz et al., 2007). However, the site of PID action and the biochemical and cellular mechanisms by which PID promotes apical PIN polarity have remained largely unresolved. Basal (rootward) PIN polarity generation involves non-polar PIN secretion followed by clathrin-mediated PIN endocytosis (Dhonukshe et al., 2007) and ARF-GEF GNOM-dependent (Geldner et al., 2003) basal PIN endocytic recycling (Dhonukshe et al., 2008). Based on this, PID could generate apical PIN localization in three different ways: (1) PID modifies newly synthesized PIN at the Golgi for its apical secretion; (2) PID modifies PIN at endosomes for its apical recycling; or (3) PID modifies PIN at the PM to promote apical recycling following endocytosis. Moreover, whereas all *pid* mutants develop pin-like inflorescences, correlating with basal PIN1 localization (Friml et al., 2004), the three-cotyledon phenotype is not fully penetrant, even in strong *pid* alleles for which PIN1 localization in embryo epidermis cells is either basal or apical (Trembl et al., 2005). In addition, apical cargo such as PIN2 in root epidermis cells remains apical in *pid* alleles (Sukumar et al., 2009). In view of the key role for PID in PIN polar targeting, these observations strongly suggest that there are other protein kinases that act redundantly with PID in establishing PIN polarity.

By testing representative members of the AGC kinase family to which PID belongs, here we identified WAG1 and WAG2 as new PIN polarity-mediating kinases. Our result show that the central serines in the three conserved TPRXS(N/S) motifs in the PINHL are the key residues on which PID, WAG1 and WAG2 act, to regulate programmed embryo development and adaptive root development. Our detailed dynamic imaging analysis puts forward a model by which PID, WAG1 and WAG2 phosphorylate PINs

<sup>1</sup>Section of Molecular Genetics, Department of Biology, Utrecht University, Padualaan 8, 3584 CH Utrecht, The Netherlands. <sup>2</sup>Molecular and Developmental Genetics, Institute of Biology, Leiden University, Sylvius Laboratory, Sylviusweg 72, 2333 BE Leiden, The Netherlands. <sup>3</sup>Department of Plant Systems Biology, Flanders Institute for Biotechnology, Technologiepark 927, 9052 Gent, Belgium.

\*These authors contributed equally to this work

<sup>†</sup>Present address: Institute of Biotechnology, University of Helsinki, P.O. box 65, FIN-00014, Helsinki, Finland

<sup>‡</sup>Present address: Department of Biological Sciences, Faculty of Sciences, National University of Singapore, 14 Science drive 4, Singapore 117543

<sup>§</sup>Authors for correspondence (p.b.dhonukshe@uu.nl; r.offringa@biology.leidenuniv.nl)



predominantly at the PM, thereby instructing endocytosis-dependent recruitment of these PINs to the GNOM-competitive apical recycling pathway for apical PIN polarity generation.

## MATERIALS AND METHODS

### Plant lines and growth conditions

The *Arabidopsis* lines *pid-14* (SALK\_049736), *wag1* (SALK\_002056), *wag2* (SALK\_070240) (Cheng et al., 2008; Santner and Watson, 2006), *eir1-1* (Luschig et al., 1998), *35S::PID* (Benjamins et al., 2001), *PID::PID-VENUS* (Michniewicz et al., 2007), *gnom* (Geldner et al., 2004), *snx1* (Jaillais et al., 2006), *vps29* (Jaillais et al., 2007) and *cpi1* (Men et al., 2008) have been described previously. Genotyping and plant growth was performed as described (Huang et al., 2010). Gene-specific primers are listed in Table S1 in the supplementary material.

### Constructs, molecular cloning, plant transformation and protein biochemistry

The constructs *pGEX-PID* (Axelos et al., 1992) and *pGEX-PIN2HL* (Abas et al., 2006) and all T-DNA constructs (see below) were introduced into *Agrobacterium tumefaciens* strain C58C1 (GV3101) (Van et al., 1974) or AGL1 (Lazo et al., 1991) by electroporation. Plant transformation was performed in *Arabidopsis* Columbia ecotype (Col-0), the *eir1-1* mutant or the *pid wag1 wag2* triple mutant using the floral-dip method (Clough and Bent, 1998). Protein purification and in vitro phosphorylation assays were performed as described previously (Huang et al., 2010).

### Molecular cloning

Primers used for cloning are listed in Table S1 in the supplementary material. The coding region of *PID* was amplified from *Arabidopsis thaliana* ecotype Columbia (Col-0) cDNA from siliques using primer set *PID* attB F and *PID*-Stop attB R. The genomic clones for *WAG1* and *WAG2* comprising, respectively, 3205 bp and 3402 bp upstream from the ATG, were amplified from *Arabidopsis thaliana* Col-0 genomic DNA using primer sets: attB1 *WAG1pWAG1* 3 F and *WAG1*-Stop attB R; attB1 *WAG2p* 2 F and *WAG2*-Stop attB R. Coding regions for *WAG* genes were PCR-amplified from *Arabidopsis thaliana* Col-0 genomic DNA using primer sets: *WAG1* attB F and *WAG1*-Stop attB R; *WAG2* attB F and *WAG2*-Stop attB R.

For constitutive overexpression, the Gateway recombination cassette was inserted in frame with the *YFP*, *CFP* or *mRFP1* coding region between the *CaMV* 35S promoter and the *CaMV* 35S terminator of *pART7* (Gleaves, 1992). For the *pGEX*-based destination vector, the Gateway recombination cassette was inserted in frame with the *GST* coding region. For the *pGreenII*-based destination vector, the recombination cassette was inserted in frame with the *YFP* coding region and the *CaMV* 35S terminator into *pGreenII0179* (Hellens et al., 2000). Expression vectors *pGEX-WAG1*, *pGEX-WAG2*, *pART7-PID-mRFP*, *pART7-WAG1-YFP* and *pART7-WAG2-CFP* were constructed using the Gateway technology (Invitrogen). Overexpression cassettes containing the genes of interest were digested with *NotI* and cloned into *pGreenII* binary vectors (Hellens et al., 2000) for *Agrobacterium*-mediated transformation of *Arabidopsis thaliana*. The *pPZP221-PIN2::PIN2-VENUS* construct was kindly provided by Christian Luschig (BOKU, Vienna, Austria). For the site-directed mutagenesis, we used the QuikChange XL Site-Directed Mutagenesis Kit (Stratagene). The oligonucleotides used to introduce mutations in the *PIN2HL* cDNA and the *pPZP221-PIN2::PIN2-VENUS* construct are listed in Table S1 in the supplementary material.

For the AGC-kinase-inducible overexpression studies, a modified version of *pER8* was used (Zuo et al., 2000). Promoters, coding regions and terminators were cloned into, respectively, the first, second and third box of the Multisite Gateway Cassette (Invitrogen) that was introduced into the modified *pER8* vector. Details of the inducible system will be described elsewhere (A.P.M. and B.S., unpublished). Three different promoters were used in the inducible system and in the constitutive expression lines: ubiquitously expressing 243 bp *G10-90* promoter (Zuo et al., 2000), cortex-specific 550 bp *CO2* promoter (Heidstra et al., 2004) and epidermis-specific 2472 bp *WER* (*WEREWOLF*) promoter (Lee and Schiefelbein, 1999). *PINOID*, *WAG1* and *WAG2* cDNAs were amplified by using

primers shown in Table S1 in the supplementary material. *PIN1-GFP2* was amplified from *PIN1::PIN1-GFP2* plasmid (Xu et al., 2006) by using primers shown in Table S1 in the supplementary material. Amplified *PID*, *WAG1*, *WAG2* and *PIN1-GFP2* were recombined into a *pDONR* vector according to the manufacturer's protocol (Invitrogen) to obtain *G10-90::XVE>>PINOID-YFP*, *G10-90::XVE>>PINOID*, *G10-90::XVE>>WAG2*, *G10-90::XVE>>WAG1*, *WER::XVE>>PIN1-GFP2*, *WER::XVE>>PINOID-mCherry*, *WER::XVE>>PINOID*, *CO2::XVE>>PINOID-YFP* and *CO2::PINOID-YFP* gene cassettes.

*WAG1::ERGFP* and *WAG2::ERGFP* were generated by fusing 2 kb of upstream sequences from *WAG1* and *WAG2* with an *ERGFP* reporter gene engineered in pGREENII-0229. *WAG1::WAG1-GFP* and *WAG2::WAG2-GFP* gene fusions were generated by fusing 3.5 kb of genomic fragments (including promoter, exon and intron regions) of *WAG1* and *WAG2* to the N-terminal of *EGFP* reporter gene engineered in pGREENII-0229. *PIN2::PIN2-mCherry* was generated by replacing the *GFP* fragment of the *PIN2::PIN2-GFP* construct (Xu and Scheres, 2005) with *mCherry*.

*PIN1-GFP2* was excised from *PIN2::PIN1-GFP2* and cloned into vector *pBluescript*. *GFP* was replaced with *EosFP* to have *PIN1-EosFP2*. *PIN1-EosFP2* was PCR amplified with 221PIN1F and 221PIN1R to bring it into second box of Multisite Gateway. *PIN2-EosFP* cloning has been previously described (Dhonukshe et al., 2007). *PIN2-EosFP* was PCR-amplified from vector *pBluescript* by using primers 221PIN2F and 221PIN2R to bring it into second box of Multisite Gateway. *PIN2* promoter was amplified from *Arabidopsis* genomic DNA by using primers *pPIN2F* and *pPIN2R* and cloned into the first box of Multisite Gateway. After that, *PIN2::PIN1-EosFP2*, *PIN2::PIN2-EosFP*, *WER::XVE>>PIN1-EosFP2*, *WER::XVE>>PIN2-EosFP* were assembled in the Multisite Gateway system. The primer sequences are shown in Table S1 in the supplementary material.

*mRFP-DNAra7* was generated from *GFP-DNAra7* (Dhonukshe et al., 2006) by replacing the *GFP* with the *mRFP* coding region. *mRFP-DNAra7* was PCR-amplified with primers 221mRFPF and 221Ara7R to bring into the second box of Multisite Gateway and thereafter the gene cassettes *CO2::XVE>>DN-Ara7-mRFP*, *CO2::DN-Ara7-mRFP* *WER::XVE>>DN-Ara7-mRFP* and *WER::DN-Ara7-mRFP* were assembled.

### Drugs

Estradiol (Sigma) and BFA (Molecular Probes) were used from DMSO stock solutions at 5  $\mu$ M estradiol and 50  $\mu$ M BFA working concentration for indicated periods.

### Immunolocalization

Wholemount immunolocalizations were performed on 3- to 5-day-old seedlings fixed in 4% paraformaldehyde in MTSB buffer as described previously (Friml et al., 2003) using an InSituPro robot (INTAVIS, Cologne, Germany). Rabbit anti-PIN1 (Friml et al., 2004), anti-PIN2 (Abas et al., 2006) and anti-PIN4 (Friml et al., 2002) primary antibodies (1/200) and Alexa (1/200, Molecular Probes) or Cy-3- (1/600, Dianova) conjugated anti-rabbit secondary antibodies were used for detection.

### Confocal microscopy

Immunofluorescence and live cell confocal laser-scanning microscopy were performed as described (Dhonukshe et al., 2006; Dhonukshe et al., 2007; Friml et al., 2004). The images were processed by ImageJ (<http://rsb.info.nih.gov/ij/>) and assembled.

### Accession numbers

The *Arabidopsis* Genome Initiative locus identifiers for the genes mentioned in this manuscript are as follows: *PID* (At2g34650), *WAG1* (At1g53700), *WAG2* (At3g14370), *AGC3-4* (At2g26700), *AGC1-1* (At5g55910), *AGC1-2* (At4g26610), *PK5* (At5g47750), *PK7* (At3g27580), *AGC2-1* (At3g25250), *AGC2-2* (At4g31000), *AGC2-3* (At1g51170), *PIN1* (At1g73590), *PIN2* (At5g57090) and *GNOM* (At1g13980).

# RESULTS

## PID and WAG protein kinases redundantly instruct PIN polarity during cotyledon and root development

PID and the WAG kinases belong to the plant-specific AGCVIII family of kinases, within which they cluster into the AGC3 subfamily (see Fig. S1 in the supplementary material). To analyze whether PID-related AGC3 kinases WAG1 and WAG2 (see Fig. S1 in the supplementary material) act redundantly with PID in regulating PIN polarity, we used the previously described *pid-14*, *wag1* and *wag2* loss-of-function mutant alleles (Cheng et al., 2008; Santner and Watson, 2006) to generate double- and triple-mutant combinations. Of the *pid-14* mutant seedlings 47% developed three cotyledons (Fig. 1A,F), consistent with previous observations for other complete loss-of-function *pid* alleles (Benjamins et al., 2001; Bennett et al., 1995; Christensen et al., 2000). In the *pid wag1* or *pid wag2* double mutants, the penetrance for the cotyledon defects remained ~50%, but a significant number of seedlings developed only one cotyledon or even lacked cotyledons (Fig. 1B,C,F). This no-cotyledon phenotype was fully penetrant for the *pid wag1 wag2* triple mutant: among 99 progeny of a *pid+ wag1 wag2* plant, 19 lacked cotyledons and were genotyped as *pid wag1 wag2* triple homozygous mutants (Fig. 1D-F), whereas the remaining 80 seedlings developed two cotyledons and were genotyped as *pid-14+ wag1 wag2* ( $n=53$ ) or *wag1 wag2* ( $n=27$ ). The no-cotyledon phenotype has also been observed for *pid pin1* double loss-of-function mutants (Furutani et al., 2007), suggesting that the three AGC3 kinases act redundantly on PIN1 and that their activity is crucial for proper cotyledon development. Immunolocalization showed that PIN1 polarity was predominantly basal with some lateral localization in epidermal cells of triple mutant embryos (Fig. 1I,J), whereas it was apical in *wag1 wag2* embryos (Fig. 1G,H), and apical in some and basal in other epidermal cells of *pid* mutant embryos (Treml et al., 2005). This corroborates the redundant action of the three AGC3 kinases on apical PIN1 polarization in the embryo, which is essential for proper initiation and development of cotyledons. Our results are largely in line with the genetic data by Cheng and coworkers (Cheng et al., 2008), except that in our hands the no-cotyledon phenotype was already fully penetrant for the *pid wag1 wag2* triple mutant.

In our analysis, the *pid wag1* and *pid wag2* double mutant roots showed strong waving phenotypes, like *wag1 wag2* double mutant roots (Fig. 1B,C,N) (Santner and Watson, 2006). Unlike the double mutants, however, the roots of *pid wag1 wag2* triple mutant seedlings were clearly agravitropic (Fig. 1D,N) and significantly shorter than those of wild-type (WT) seedlings (Fig. 1K-M). The auxin reporter *DR5rev::ER-GFP* (*DR5::GFP*) was expressed more strongly on both sides of *pid wag1 wag2* root tips compared with WT (Fig. 1P,Q), indicating higher auxin levels that inhibit root growth and thus explaining the short-root phenotype of *pid wag1 wag2*. Moreover, this *DR5::GFP* expression persisted after gravity stimulation (Fig. 1R,Q), indicating that the agravitropy of triple mutant roots is due to their inability to asymmetrically distribute auxin (Fig. 1Q) and suggesting defects in PIN polarity. Indeed, the most distal cells of the triple-mutant root epidermis displayed basal localization of PIN2 as compared with its apical localization in WT, and the clear apical PIN2 polarity observed in *wag1 wag2* lateral root cap cells was absent in triple-mutant roots. Basal localization of PIN2 in the cortex was not affected in *pid wag1 wag2* (Fig. 1T,S). Our expression analysis (Fig. 1U-Y), together with previous expression studies (Cheng et al., 2008; Michniewicz et al., 2007; Santner and Watson, 2006), indicate that PID, WAG1

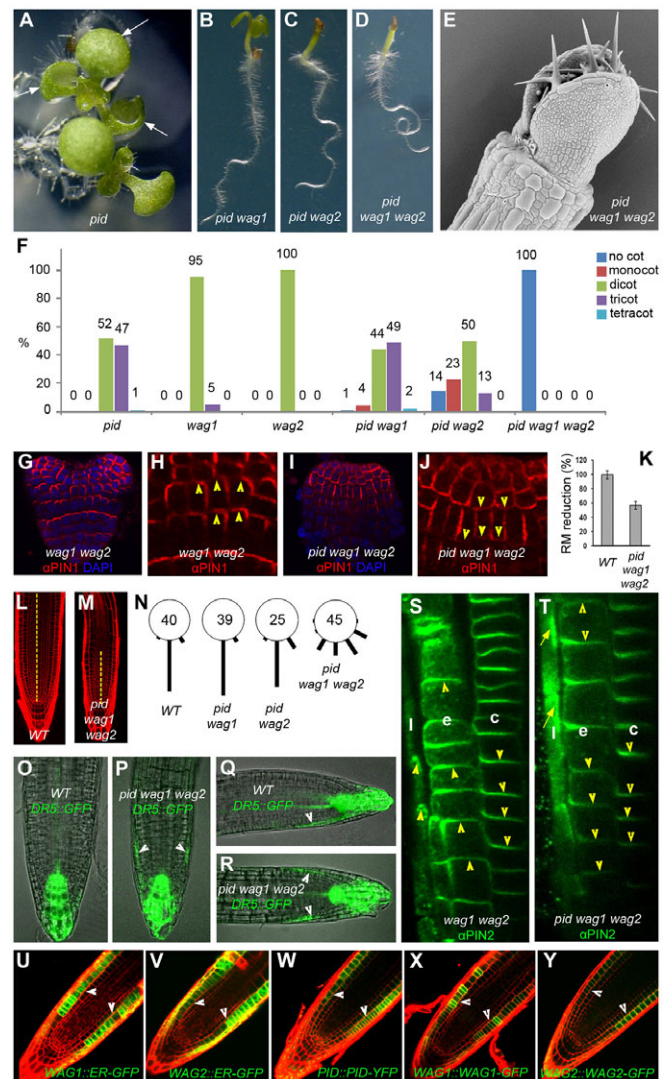

**Fig. 1. PID and WAG protein kinases redundantly instruct apical PIN polarity during cotyledon and root development.**

(A-F) Cotyledon phenotypes. (A) A three-cotyledon seedling (white arrows) in a *pid+* segregating population. (B) A tricot *pid wag1* seedling. (C) A no-cot *pid wag2* seedling. (D) A no-cot *pid wag1 wag2* seedling showing agravitropic root growth. (E) Scanning electron microscopy detail of the apex of a no-cot *pid wag1 wag2* seedling. (F) Frequency of cotyledon defects observed in the indicated mutant lines, assuming that 1 in 4 seedlings is homozygous for the *pid* mutation. About 400 seedlings were scored for each line. (G-J) Wholemount immunolocalization of PIN1 in *wag1 wag2* (G,H) or *pid wag1 wag2* (I,J) embryos. (G,I) Merge of the PIN1 (Cy-3) and the 4'-6-diamidino-2-phenylindole (DAPI) images. (H,J) Magnified section of the PIN1 (Cy-3) image. Yellow arrowheads depict PIN polarity. (K-M) The root meristem of *pid wag1 wag2* triple mutants is shorter than wild type (WT). (N) Root gravitropic response histogram of the indicated lines. The number of seedlings scored per line is indicated in the middle of each circle. (O-R) Expression of the auxin reporter *DR5rev::ER-GFP* in wild-type (WT) and *pid wag1 wag2* triple-mutant roots before (O,P) and after (Q,R) gravity stimulation. White arrowheads indicate enhanced *DR5rev::ER-GFP* expression in the lateral root cap. (S,T) Wholemount immunolocalization of PIN2 in roots of 5-day-old *wag1 wag2* (S) or *pid wag1 wag2* (T) seedlings. c, cortex; e, epidermis; l, lateral root cap. Yellow arrowheads depict PIN polarity. (U-Y) Expression of WAG1 and WAG2 promoter *ER-GFP* fusions (U,V) or *PID* gene *VENUS* (W) or WAG1- or WAG2 gene *GFP* fusions (X,Y) in *Arabidopsis* roots. White arrowheads point to the expression in the epidermis and lateral root cap.



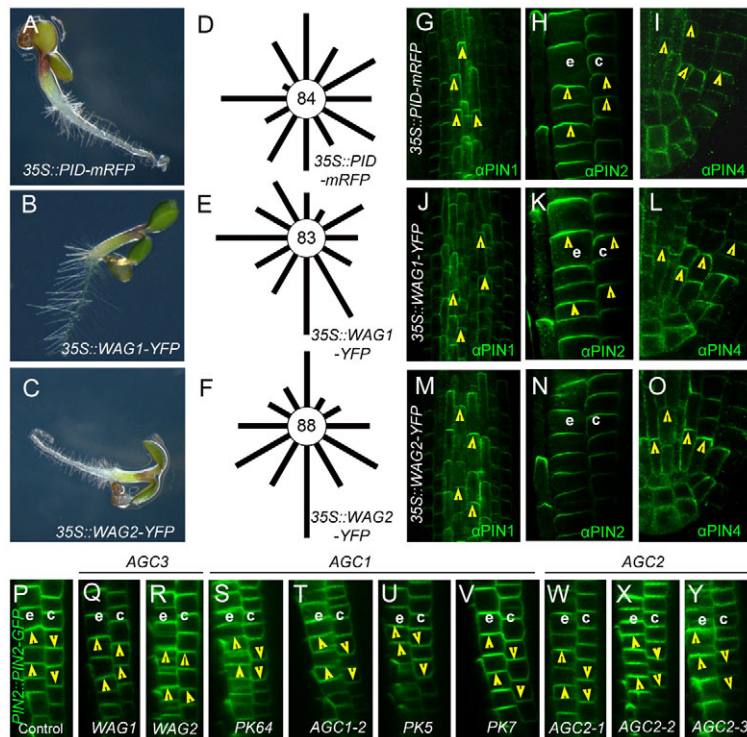

**Fig. 2. Overexpression of PID, WAG1 and WAG2, but not of other AGC kinases, instructs apical localization of PIN proteins.** (A–O) Overexpression of PID-mRFP, WAG1-YFP or WAG2-YFP leads to comparable seedling phenotypes, including root meristem collapse (A–C) and agravitropic root growth (D–F) as a result of apically localized PIN1 in the root stele (G,J,M), PIN2 in the cortex (H,K,N) and PIN4 in the root meristem (I,L,O). PIN proteins were detected by wholemount immunolocalization. (P–Y) Estrogen-inducible expression of WAG1 and WAG2, but not of other AGC kinases, leads to apicalized PIN2-GFP localization in the root cortex. c, root cortex; e, root epidermis. Yellow arrowheads depict PIN polarity.

and WAG2 are expressed predominantly in the epidermis and in the lateral root cap, and that their loss-of-function specifically perturbs apical PIN localization and disrupts upward auxin flow in these layers, leading to defects in cotyledon development, root growth and root gravitropism.

### Overexpression of PID, WAG1 and WAG2, but not other AGC kinases induces basal-to-apical PIN polarity shifts

We next analyzed the effect of overexpression of these kinases on PIN polarity and plant development. Seedlings of a 35S::PID-mRFP control line showed phenotypes previously observed for PID overexpression (Benjamins et al., 2001), such as agravitropic growth and eventual collapse of the main root meristem (Fig. 2A,D). Overexpression of WAG1-YFP and WAG2-YFP resulted in similar phenotypes (Fig. 2B,C,E,F). Similarly, estradiol-inducible overexpression of PID, WAG1 or WAG2 led to gravity loss and collapse of the main root meristem preceded by loss of the auxin maximum, as reported by the disappearance of *DR5::GFP* expression (see Fig. S2A–Q in the supplementary material). This was further supported by significant reduction in the root meristem collapse by NPA-mediated auxin efflux inhibition (Fig. S2Q). Immunolocalization showed that PIN1, PIN2 and PIN4 were all apicalized by PID, WAG1 or WAG2 overexpression (Fig. 2G–O; see Fig. S3A–H in the supplementary material). These results confirm our observations in *pid wag1 wag2* loss-of-function embryos and roots that the redundant activity of these kinases triggers apical PIN polarization, and raised the question whether other plant AGC kinases are capable of switching PIN polarity. By using the estradiol-inducible expression system we tested the effect of overexpression of AGC1-1 [also referred to as PK64 (Mizoguchi et al., 1992) or D6K (Zourelidou et al., 2009)], AGC1-2, PK5 and PK7 as representatives of the AGC1 subfamily on PIN2-GFP polarity, and also tested three AGC2 kinases. Only WAG1

and WAG2 induced the basal to apical shift of PIN2-GFP in root cortex cells, eventually leading to root meristem collapse, whereas the other kinases tested did not affect PIN2-GFP polarity (Fig. 2P–Y) or root meristem integrity (data not shown). These results indicate that, from the tested AGCVIII kinases, PID, WAG1 and WAG2 are the PIN polarity regulators.

### Phosphorylation of conserved serines in the PIN2HL by PID, WAG1 and WAG2 is essential for auxin dynamics during gravitropic root growth

Previously, we showed that PID phosphorylates the PIN2HL in vitro (Michniewicz et al., 2007) and our current analysis showed that apical PIN2 localization in root epidermis and the lateral root cap matches with the epidermis and later root cap-specific predominant expression of PID, WAG1 and WAG2 (this study). Therefore, we sought to identify the PID, WAG1 and WAG2 phosphorylated residues in the PIN2HL. Based on our recent identification of the middle serine residue in three conserved TPRXS(N/S) motifs in the PIN1HL as PID targets, and the conservation of these motifs between PIN proteins (Huang et al., 2010), we first tested whether these serines in the PIN2HL (at positions 237, 258 and 310, renumbered hereafter as 1, 2 and 3) were also phosphorylated by PID (Fig. 3A,B). For this we performed in vitro phosphorylation assays using mutant PIN2HL versions in which the three serines (S) were replaced by alanines (A). In vitro incubation of the S1,2,3,A mutant version with GST-PID showed that these three serines are the only PID phospho-targets in the PIN2HL (Fig. 3B). Similar results were obtained when the WT and mutant GST-PIN2HL versions were incubated with purified GST-tagged WAG1 and WAG2 (Fig. 3C). The results reveal that the three AGC3 kinases phosphorylate the PIN2HL in vitro and that the substrate-specificity among the three kinases is conserved, thereby corroborating the redundant action of PID, WAG1 and WAG2 to promote apical PIN polarity.

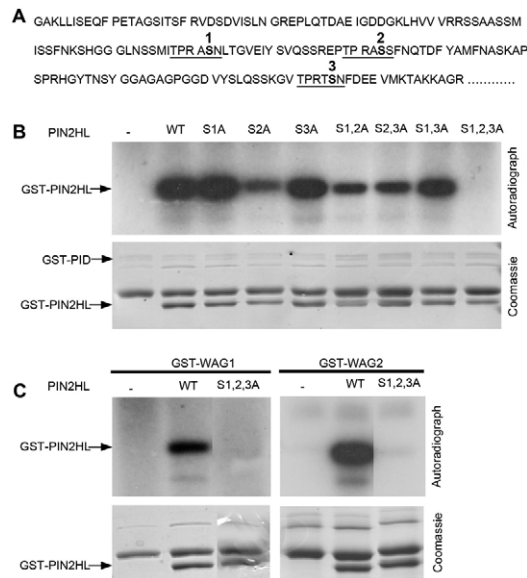

**Fig. 3. The central serines in three conserved TPRXS(N/S) motifs of the PIN2HL are the phosphorylation targets of PID, WAG1 and WAG2 kinases in vitro.** (A) N-terminal part of the PIN2HL with the phosphoserines in the three TPRXS(N/S) motifs indicated. (B) GST-PIN2HL is phosphorylated by GST-PID. The phosphorylation is gradually reduced when one or two serines are replaced with alanines (indicated as S1A, S2A, S3A, S1,2A, S2,3A and S1,3A, respectively) and is completely abolished when all of the three serines are mutated to alanines (S1,2,3A). (C) GST-PIN2HL, but not the GST-PIN2HL S1,2,3A mutant form, is phosphorylated by GST-WAG1 or GST-WAG2.

To investigate the biological significance of the AGC3 kinase-dependent phosphorylation for PIN2 in plants, mutations were introduced into a *PIN2::PIN2-Venus* construct to replace all three serines (S) by alanines (A). The resulting *PIN2::PIN2-Venus* S1,2,3A loss-of-phosphorylation mutant construct and the WT *PIN2::PIN2-Venus* construct (hereafter named *PIN2V SA* and *PIN2V*, respectively) were transformed into the *Arabidopsis pin2* loss-of-function allele *eir1-1*, and fluorescence-positive, single-locus T-DNA insertion lines were selected for further analysis. *PIN2V* seedling roots showed wild-type wavy and gravitropic growth (Fig. 4A,B,E). By contrast, the *eir1-1* and *PIN2V SA* seedling roots exhibited a linear growth pattern interrupted by random turns (Fig. 4C-E). These results indicate that AGC3 kinase-mediated phosphorylation of PIN2 is important for normal wavy, gravitropic root growth. For *pin2* loss-of-function mutants, the agravitropic root growth has been correlated with changes in the auxin dynamics in the root tip (Abas et al., 2006; Ottenschlager et al., 2003). Observation of the *DR5::GFP* auxin reporter expression showed that in *PIN2V SA* seedling roots the *DR5::GFP* signal is stronger on both sides of the root compared with *PIN2V* (Fig. 4F,G). Following gravity stimulation, the *DR5::GFP* signal in *PIN2V SA* roots remained symmetrically on both sides of root meristem (Fig. 4I), which was in contrast to the asymmetric signal observed in *PIN2V* roots (Fig. 4H). A similar distribution was observed in *pid wag1 wag2* mutant roots (Fig. 4P,R). The similarities in root phenotypes between the *PIN2V SA* and the *pid wag1 wag2* triple mutant seedlings corroborate that the three serines are the phosphorylation targets of the PID, WAG1 and WAG2 kinases in vivo, and indicate that AGC3 kinase activity in the root channels through PIN2 to facilitate normal root growth. To

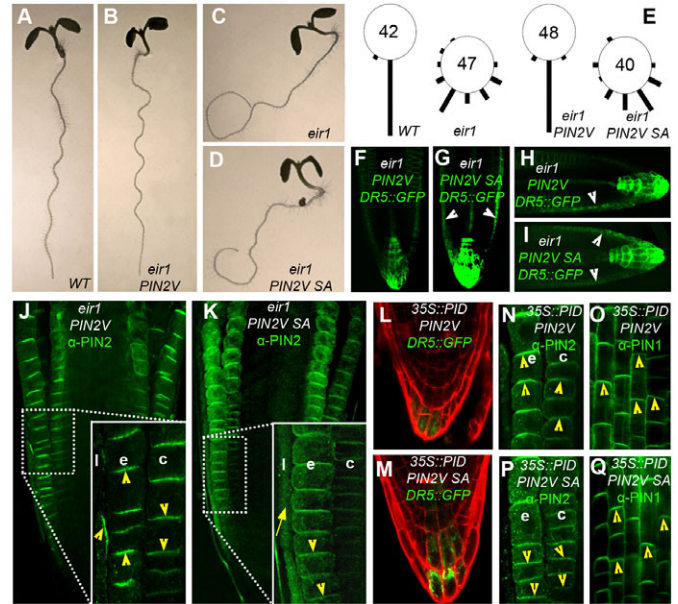

**Fig. 4. AGC3 kinase-mediated phosphorylation of PIN2 controls apical PIN2 localization, auxin distribution and root gravitropism.** (A-D) Phenotype of 7-day-old seedlings of Columbia wild-type *Arabidopsis* (A), *eir1-1 PIN2::PIN2V* (B), *eir1-1* (C) and *eir1-1 PIN2::PIN2V SA* (D). (E) Root gravitropic response histogram of the indicated lines. The number of seedlings scored per line is indicated in the middle of each circle. (F-I) Expression of the *DR5rev::ER-GFP* reporter in *eir1-1 PIN2::PIN2V* (F,H) and *eir1-1 PIN2::PIN2V SA* (G,I) seedlings roots before (F,G) and 48 hours after (H,I) gravity stimulation. White arrowheads indicate enhanced *DR5rev::ER-GFP* expression. (J,K) Immunolocalization of PIN2 in roots of 5-day-old seedlings of the *eir1-1 PIN2::PIN2V* (J) and *eir1-1 PIN2::PIN2V SA* (K) lines. Yellow arrow in the magnified image indicates loss of PIN2 polarity in the lateral root cap. Yellow arrowheads depict PIN polarity. c, cortex; e, epidermis; l, lateral root cap. (L,M) *DR5rev::ER-GFP* expression is higher in *35S::PID PIN2::PIN2V SA* (M) than in *35S::PID PIN2::PIN2V* (L). (N-Q) Immunolocalization of PIN2 (N,P) and PIN1 (O,Q) in 3-day-old *35S::PID PIN2::PIN2V* (N,O) or *35S::PID PIN2::PIN2V SA* (P,Q) seedling roots. Yellow arrowheads depict PIN polarity.

correlate the phenotypes and changes in auxin dynamics in the *PIN2V SA* and *pid wag1 wag2* mutant roots with changes in PIN2 polarity, we observed *PIN2V SA* directly by confocal microscopy or following wholemount immunolocalization using PIN2-specific antibodies. In agreement with previous observations for PIN2 or PIN2-GFP (Abas et al., 2006; Muller et al., 1998), *PIN2V* was apically localized in lateral root cap (LRC) and epidermal cells, and showed basal localization in young cortical cells (Fig. 4J) and a basal-to-apical shift in older cortical cells. By contrast, *PIN2V SA* was basally localized in young epidermis and cortex cells of the distal root tip, whereas older epidermis and cortex cells showed a gradual basal-to-apical shift (Fig. 4K), a PIN2 localization pattern similar to that in *pid wag1 wag2* triple-mutant roots.

*PIN2V SA* expression in the *eir1-1 35S::PID* background resulted in a stronger *DR5::GFP* signal in the collumella compared with *PIN2V* (Fig. 4M,L). Whereas *PIN2V* polarity in cortical root cells was shifted from basal-to-apical by *PID* overexpression, *PIN2V SA* polarity remained predominantly basal as in the WT background (Fig. 4P,N), demonstrating that the loss-of-phosphorylation protein was insensitive to kinase overexpression. In the stele cells of the same roots, PIN1 was localized at the apical



side (Fig. 4O,Q), demonstrating that *PID* overexpression in these seedlings was sufficient to induce a basal-to-apical shift in PIN polarity.

These results are in line with the above observations on the redundant role of these three AGC3 kinases in instructing apical PIN localization by phosphorylating the three TPRXS(N/S) motifs within PIN, but also indicate that in some cells, such as older epidermal and cortex cells, PIN apicalization probably involves an AGC3 kinase-unrelated mechanism.

### **PID, WAG1 and WAG2 instruct apical PIN polarity through their non-polar PM association**

As the root provides a relatively easier PIN polarity-based response system in which individual cells are traceable, we focused our further analysis on roots. Previous immunolocalization of *PID*-VENUS (YFP) in root epidermis cells indicated that *PID* is a PM-associated protein kinase that localizes predominantly at the apical and basal cell sides, where it partially colocalizes with its PIN phosphorylation targets (Michniewicz et al., 2007). More detailed analysis of the *PID::PID-YFP* line (Michniewicz et al., 2007) and our *WAG1::WAG1-GFP* and *WAG2::WAG2-GFP* lines showed that, in their epidermal expression domain, all the three fusion proteins also display a significant signal at the lateral PM. As the slightly stronger signal at the apical and basal PM can be explained by overlapping signals from neighboring cells, we conclude that the kinases localize symmetrically at the PM (Fig. 5A-C) in the same cells where PIN2 shows polar localization (Fig. 5E), generating a situation in which a kinase is non-polar and its substrate polar.

To address the question at which location in the cell these kinases phosphorylate PINs, we focused our analysis on *PID*. Inducible expression of *PID* showed that newly synthesized *PID* arrives at the PM in a non-polar manner (Fig. 5D) and that *PID* retains its symmetric localization after shifting PIN1 localization from basal to apical (Fig. 5F). Apart from their PM localization, *PID*, *WAG1* and *WAG2* also localized to subcellular punctuate structures (Fig. 5A-C), and more detailed analysis of the *PID::PID-YFP* line showed that *PID* only partially colocalizes with the endocytic tracer FM-4-64 (Fig. 5G). Moreover, *PID* colocalizes with PIN1 predominantly at the PM and much less on the intracellular vesicles in *Arabidopsis* root cells (Fig. 5H,I), similar to what has previously been observed in *Arabidopsis* protoplasts (Furutani et al., 2007), indicating that PIN1 and *PID* reside on divergent intracellular vesicles. Intriguingly, in the *cpi1* sterol biosynthesis mutant (Men et al., 2008), arrival of newly synthesized *PID* at the PM was reduced after a few hours of steroid-induced kinase expression as compared with the WT (Fig. 5J,K) and remained less effective in provoking rapid basal-to-apical PIN localization (Fig. 5L,M) and the root phenotypes associated with it (Fig. 5N). Based on the pleiotropic phenotypes of *cpi1-1* and the necessity of sterols for many processes, we cannot exclude that other processes in the *cpi1-1* mutant background are indirectly contributing to the observed defects in PIN1 trafficking. Nonetheless, the results showing (1) non-polar PM arrival of newly synthesized *PID*, (2) colocalization of *PID* and PIN at the PM and only occasionally in intracellular vesicles, (3) PIN relocation after *PID* arrival at the PM, (4) persistence of non-polar *PID* after PIN relocation and (5) the reduced PM localization of *PID* in the *cpi1* mutant background ameliorating its effect on PIN polarity, all put forward a model in which *PID* phosphorylates PINs mainly at the PM to induce their apicalization. As *WAG1* and *WAG2* also localize non-polarly at the PM similar to *PID*, and act redundantly with *PID* to regulate PIN polarity, we consider that *WAG1* and *WAG2* also exert their effect by phosphorylating PIN mainly at the PM.

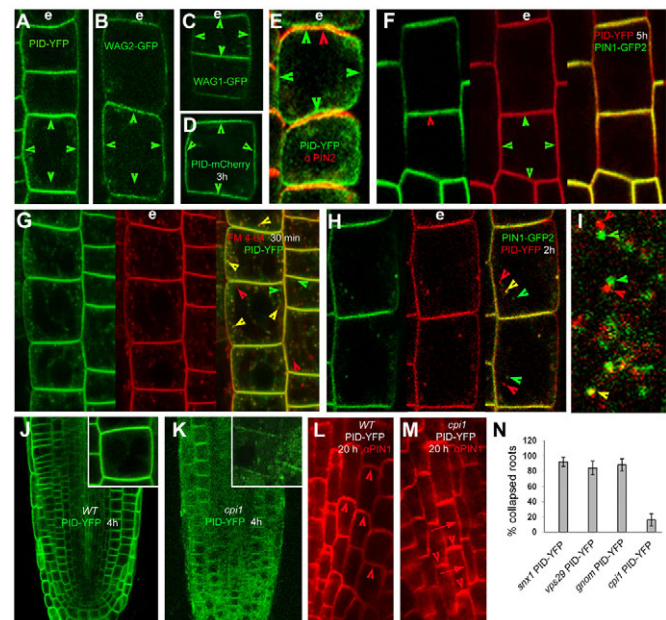

**Fig. 5. *PID*, *WAG1* and *WAG2* predominantly phosphorylate PINs at the PM to induce their apical trafficking.** (A-C) Predominant non-polar PM localization of *PID::PID-YFP* (A), *WAG1::WAG1-GFP* (B) and *WAG2::WAG2-GFP* (C). (D) Non-polar arrival of *PID* at the PM following 3 hours of induced expression of *WER::XVE>>PID-mCherry*. (E) Apical PIN2 and non-polar *PID* localization at the PM of an epidermis cell. (F) Apical PIN2::PIN1-GFP2 (green) and non-polar *PID-YFP* (red) localization after 5 hours of induction of *G10-90::XVE>>PID-YFP* expression. Green and red arrowheads indicate *PID* and PIN2 PM localization, respectively. (G) *PID-YFP* (green arrowheads) shows partial colocalization with the endocytic tracer FM4-64 (red arrowheads). (H,I) *PID-YFP* (red arrowheads) and PIN1-GFP2 (green arrowheads) predominantly colocalize (yellow arrowheads) at the PM (H, 44% of PIN1 with PIN1, and 83% of PIN1 with *PID*) and only marginally at intracellular vesicles (I, 5% of *PID* with PIN1, and 4% of PIN1 with *PID*). (J,K) After 4 hours of *G10-90::XVE>>PID-YFP* expression, *cpi1* sterol mutant roots (K) show much less PM localization of *PID-YFP* than WT roots (J). The same confocal settings were used for panels J and K. Insets show higher magnification views. (L-N) After 20 hours of *G10-90::XVE>>PID-YFP* expression, the apical-to-basal switch in PIN1 polarity is observed in wild-type (L), but not *cpi1* roots (M). As a result, the *PID* overexpression-induced root meristem collapse is delayed in 6-day-old seedlings of *cpi1*, but not of *snx1*, *vps29* or *gnom* mutant background (N). Red arrowheads indicate apical PIN localization (in L) and basal PIN localization (in M), and red arrows indicate lateral PIN1 localization (in M).

### **Redundant *PID* and *WAG* action recruits PINs to an ARF-GEF GNOM-competitive apical recycling pathway**

To probe whether the action of the *PID* and *WAG* kinases on PIN polarity involves known PIN trafficking regulators, such as GNOM (Geldner et al., 2003; Steinmann et al., 1999), SNX1 (Jaillais et al., 2006) and VPS29 (Jaillais et al., 2007), we tested the effect of induced *PID* expression on PIN polarity in the *snx1*, *vps29* and *gnom* mutant backgrounds. In all three mutants, *PID* arrived at the PM as in the WT control and triggered PIN1 and PIN2 apicalization, leading to the root meristem collapse (see Fig. S4A-L in the supplementary material). These results show that kinase-induced apical PIN polarity does not act through SNX1, VPS29 and GNOM. Interestingly, in *gnom*, the kinase-induced PIN



polarity switch occurred slightly faster than in WT, suggesting that PID and GNOM operate in two opposing pathways for regulating PIN polarity.

We used the fungal toxin brefeldin A (BFA), which targets GNOM-mediated basal recycling of PINs (Geldner et al., 2003; Kleine-Vehn et al., 2008a), to dissect the basal and apical recycling pathways in plants. Elevated levels of PID, WAG1 or WAG2 in their endogenous epidermal expression domain in the co-presence of BFA reduced normally observed PIN1 and PIN2 entrapment within BFA compartments, as evidenced by formation of much smaller and rapidly disappearing PIN-positive BFA compartments as compared with the BFA treatment alone (Fig. 6A-D,J,K). This is in line with the recently shown effect of ectopically expressed PID on PIN1 localization (Kleine-Vehn et al., 2009). In accordance with reduced localization of PIN to the BFA compartments in excess PID, PIN2 persistence into BFA compartments in root epidermis cells was significantly enhanced (as measured by the extent of PIN2 at the PM) in the *pid wag1 wag2* triple mutant as compared with WT or the *wag1 wag2* double mutant (Fig. 6E-G; see Fig. S5 in the supplementary material), and loss-of-phosphorylation PIN2V SA showed enhanced persistence in BFA compartments as compared with PIN2V (Fig. 6H,I). Root epidermis expressed PIN1-EosFP2 is basal as opposed to apical PIN2, probably owing to affinity differences of the AGC3 kinases for the respective PINHLs. PIN1-EosFP2 shifted its localization from basal-to-apical after prolonged BFA treatment (Fig. 6L). However, this BFA-induced PIN1-EosFP2 apicalization did not occur in the *pid wag1 wag2* mutant and, instead, PIN1-EosFP2 remained less polar (Fig. 6M). Also in *cpi1* mutant roots (with reduced PM localized PID), prolonged BFA treatment did not lead to a basal-to-apical shift, but rather to less-polar PIN1-EosFP2 localization (Fig. 6N,O). Together, these results confirm the redundant action of PID, WAG1 and WAG2, and indicate that PIN phosphorylation by these three kinases reduces their affinity for the basal, GNOM-dependent recycling pathway and instructs their recruitment in the GNOM-competitive apical recycling pathway.

### AGC3 kinases act after non-polar PIN secretion to the PM to promote apical PIN recycling

We used a *PIN2::PIN1-EosFP2* fusion to track the real-time relocation of basally localized PINs to the apical cell side in root epidermis cells. Photoconversion of PIN1-EosFP2 from green to red at the basal side of epidermis and simultaneous induction of PID directly demonstrated PID-induced PIN transcytosis (translocation of PM cargo from one polar domain to another; Fig. 7C). Interestingly, upon reversal of PID induction (by washing out the induction medium), apically localized PIN2::PIN1-EosFP2 returned to the basal PM domain (Fig. 7D), indicating that constitutive PID action is required for maintaining apical PIN localization.

Next, we assessed polarization of newly synthesized PINs in WT and kinase loss- and gain-of-function mutant backgrounds. Basal localization of PIN1 is established by non-polar secretion followed by basal recycling (Dhonukshe et al., 2008) (Fig. 7M,N). The secretion of induced PIN2 was also non-polar and was followed by its translocation to the apical cell side in WT (Fig. 7O,P), whereas it translocated to the basal side in the *pid wag1 wag2* triple mutant (Fig. 7Q,R). PIN1 secretion was initially symmetric in excess PID and, instead of going basal, PIN1 went from non-polar to the apical cell side (Fig. 7S,T). This corroborates that PID, WAG1 and WAG2 do not act during the initial PIN secretion but only when the PINs colocalize with the kinases at the PM, and indicates that,

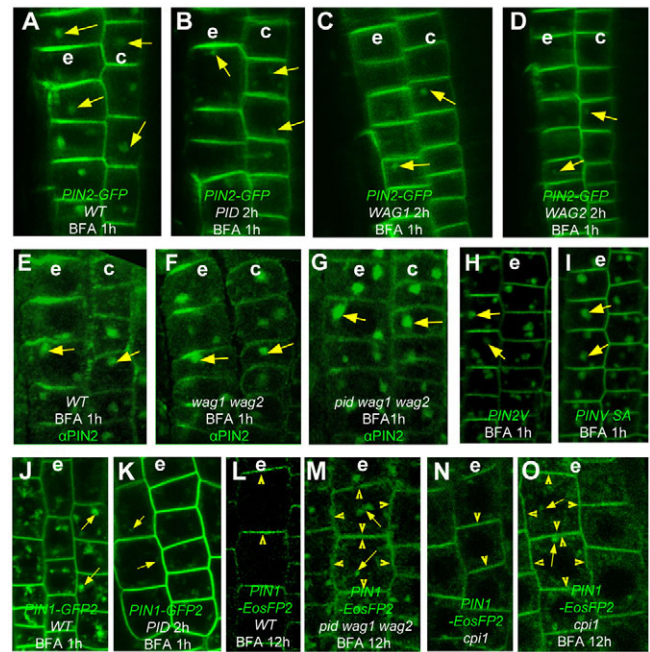

**Fig. 6. PID, WAG1 and WAG2 kinases recruit PINs to the apical recycling pathway by reducing their affinity for the BFA-sensitive basal recycling pathway.** (A-D) Two hours *G10-90::XVE>>PID* (B), *G10-90::XVE>>WAG1* (C) and *G10-90::XVE>>WAG2* (D) induction makes *PIN2::PIN2-GFP* less sensitive to basal recycling inhibitor BFA, as compared with the control (A). (E-I) PIN2 accumulation into BFA compartments in root epidermis cells is enhanced in the *pid wag1 wag2* triple mutant (G) as compared with WT (E) or the *wag1 wag2* double mutant (F). Also, loss-of-phosphorylation *PIN2::PIN2V SA* (I) displays enhanced accumulation in these compartments as compared with *PIN2::PIN2V* (H). (J,K) Induction of *G0-90::XVE>>PID* expression (K) recruits basal *PIN2::PIN1-GFP2* to the apical targeting pathway as evidenced by formation of smaller and rapidly disappearing PIN1-positive BFA compartments (before their eventual translocation to the apical side) as compared with the control (J). (L,M) *PIN2::PIN1-EosFP2* (green) apicalization by 12 hours BFA treatment (L) is impaired in *pid wag1 wag2* (M). (N,O) BFA-induced apicalization of basally localized *PIN2::PIN1-EosFP2* (N) is reduced in the sterol biosynthesis mutant *cpi1* (O). Yellow arrows depict BFA compartments and yellow arrowheads show PIN polarity.

in the epidermis, efficient PIN1 phosphorylation by excess PID triggers its translocation from non-polar to the apical side similar to that of PIN2 with endogenous PID, WAG1 and WAG2 levels.

Finally, to visualize PID, WAG1 and WAG2 kinase action on oppositely localized PINs in the same cell, we analyzed lines coexpressing *PIN2::PIN1-GFP2* (basal in epidermis and cortex) (Wisniewska et al., 2006) and *PIN2::PIN2-mCherry* (apical in epidermis and basal in cortex) (Fig. 7A). Upon PID induction, only PIN1 in the epidermis and both PIN1 and PIN2 in the cortex showed apicalization (Fig. 7B), reinforcing that *PID* gain-of-function maintains apically localized PINs, and shifts basally localized PINs to the apical domain.

### PID-, WAG1- and WAG2-triggered apical PIN transcytosis involves the endocytosis-associated Rab5 pathway

Coexpression of PID and the dominant-negative *Arabidopsis* Rab5 homolog (DN-Ara7), which previously has been shown to reduce PIN endocytosis in roots (Dhonukshe et al., 2008), did not affect

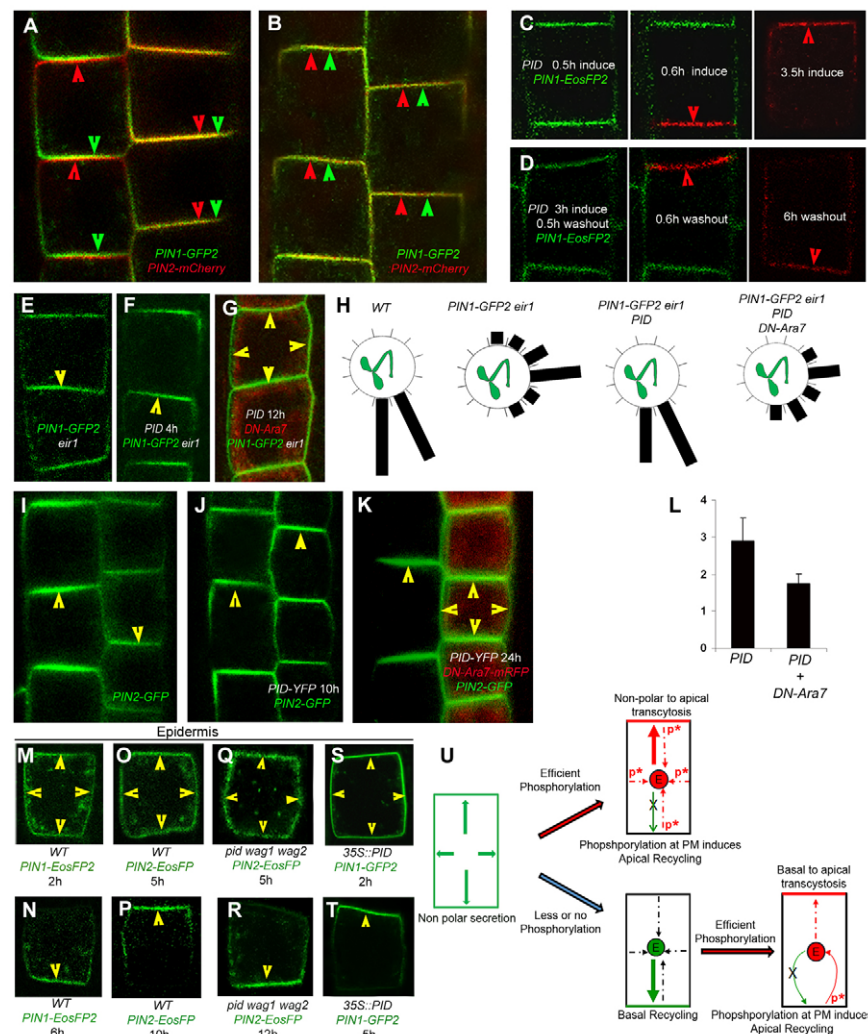

**Fig. 7. The endocytosis-associated Rab5 pathway is required for PID, WAG1 and WAG2 phosphorylation-triggered basal-to-apical and non-polar to apical PIN transcytosis.** (A,B) *G10-90::XVE>>PID* induction specifically affects the basal cargo (*PIN2::PIN1GFP2* in epidermis and cortex and *PIN2::PIN2mCherry* in cortex) for its apical relocation. (C,D) Green-to-red photoconverted *PIN2::PIN1-EosFP2* shows basal-to-apical transcytosis upon *WER::XVE>>PID* induction by estradiol (C) and displays apical-to-basal relocation after estradiol washout (D). (E-G) *WER::XVE>>PID* is unable to induce basal-to-apical transcytosis of *PIN2::PIN1-GFP2* (green) in the presence of endocytosis-impairing *WER::XVE>>DN-Ara7-RFP* (red). (H) Root gravitropic response histogram showing that *WER::XVE>>PID* induction rescues the gravity defects of *pin2 PIN2::PIN1GFP2* by PIN1 apicalization in the epidermis, whereas co-induction of the endocytic inhibitor *WER::XVE>>DN-Ara7-RFP* annihilates this rescue. (I-L) Cortex-specific *CO2::XVE>>* driven expression of DN-Ara7-mRFP (red) inhibits PID-mediated apicalization of *PIN2::PIN2-GFP* (green, compare J with K). (L) PIN2 polarity index (ratio of apical to lateral PIN2-GFP intensity) in the cortex. Bars show means and s.d. (M-T) Induction of *WER::XVE>>PIN1-EosFP2* (N) or *WER::XVE>>PIN2-EosFP* (P) expression in the epidermis first results in non-polar secretion (M,O) followed by recruitment to the basal or the apical PM (N,P), respectively. Inducible expression of *WER::XVE>>PIN2-EosFP* in *pid wag1 wag2* results in non-polar (Q) to largely basal (R) PIN2 trafficking. Non-polarly secreted *WER::XVE>>PIN1-GFP2* (green, S) gradually relocates to the apical membrane in *35S::PID* (T). Time of induction of expression is indicated. Arrowheads show PIN polarity. (U) Model for PID-, WAG1- and WAG2-kinase action: non-phosphorylated PIN proteins (green) arrive at the PM in a non-polar manner; phosphorylation at the PM (red) triggers non-polar or basal-to-apical PIN trafficking.

the abundance and normal non-polar localization of PID (not shown) but led to symmetric PIN2-GFP localization in the cortex (Fig. 7I-L). Moreover, epidermis-specific coexpression of DN-Ara7 inhibited PID-triggered basal-to-apical transcytosis of *PIN2::PIN1-GFP2*, which is required for rescuing the agravitropic *pin2* phenotype (Wisniewska et al., 2006) (Fig. 7E,F,H; see Fig. S6A-F in the supplementary material). Instead, PIN1-GFP2 became apolar and was unable to rescue the agravitropic phenotype (Fig. 7G,H; see Fig. S5C,F in the supplementary material). These data show that PID-driven basal-to-apical PIN transcytosis requires the endocytosis-related Rab5 pathway.

## DISCUSSION

### *Arabidopsis* PID, WAG1 and WAG2 kinases are PIN polarity determinants involved in both programmed and environmentally regulated development

Previously, we have shown that the PID kinase and PP2A phosphatase act antagonistically on PIN polarization through reversible phosphorylation of the PINHL (Friml et al., 2004; Michniewicz et al., 2007). Here, we identified two PID-related kinases, WAG1 and WAG2, as novel PIN polarity regulators. In the embryo and the root, the WAG kinases act redundantly with PID,



with the same phosphorylation specificity and ability to regulate apical PIN localization. Our results are in line with the previously reported functional analysis of *WAG1* and *WAG2* (Cheng et al., 2008; Santner and Watson, 2006), but are seemingly contradictory to the observed inverse regulation of *PID* and *WAG2* expression during valve margin specification in fruits that correlated with PIN3 polarity changes (Sorefan et al., 2009). This suggests that the effect of the kinases on PIN polarity might depend on tissue-specific factors, which might be different in embryos or seedlings than in fruits.

*PID* and the *WAG* kinases belong to the plant-specific AGCVIII family of kinases, within which they cluster into the AGC3 subfamily (see Fig. S1 in the supplementary material). Testing kinases from other AGC subfamilies showed that *PID*, *WAG1* and *WAG2*, but not these other AGC kinases, can induce a basal-to-apical shift in PIN polarity. Our results corroborate a previous functional analysis of the D6 kinases (AGC1-1, AGC1-2, PK6 and PK5), which seem to regulate polar auxin transport but do not affect PIN polarity (Zourelidou et al., 2009).

Based on the phenotypes of the *pid* loss-of-function mutant in the embryo and inflorescence, the *PID* kinase has initially been considered as regulator of programmed plant development (Benjamins et al., 2001; Christensen et al., 2000). We extend this notion by showing that PIN polarity is apical instead of basal in the outer layers of the root owing to tissue-specific expression of *PID*, *WAG1* and *WAG2*. However, the strong wavy root phenotype of the *wag1 wag2* double mutant (Santner and Watson, 2006), the mild agravitropy of *pid* mutant roots (Sukumar et al., 2009) and our observation that *pid wag1 wag2* mutant roots are strongly affected in both wavy and gravitropic growth also point to an important role for these three kinases in adaptive plant development. The impairment of apical PIN2 polarity in the absence of *PID*, *WAG1* and *WAG2* leads to altered auxin distribution, resulting in a reduced root meristem size and agravitropic root growth.

### Kinase-instructed basal-to-apical transcytosis competes with GNOM-dependent basal recycling

Previously, we have shown a two-step mechanism for generation of basal PIN polarity in plants (Dhonukshe et al., 2008). Our current results now identify a two-step mechanism that generates apical PIN polarity in which non-polar PIN secretion is followed by *PID*-, *WAG1*- or *WAG2*-instructed apical PIN recycling. GNOM-based basal recycling acts predominantly in the generation of basal PIN localization, whereas *PID*-, *WAG1*- and *WAG2*-based apical recycling acts predominantly in the generation of apical PIN polarity. Therefore, we propose that the phosphorylation status-dependent relative contribution of both pathways determines whether PIN will traffic towards the apical or basal cell side.

In analogy, transcytosis of certain mammalian proteins also depends on phosphorylation (Casanova et al., 1990). Some of these transcytosed proteins, such as the polymeric immunoglobulin receptor, pass through retromer compartments (Verges et al., 2004). Our results, conversely, show that in plant cells *PID* and *WAG* kinase-instructed transcytosis and apical recycling of PIN proteins occurs in the absence of the VPS29- and SNX1-dependent retromer complex, which is in accordance with the finding that the basal-to-apical shift by prolonged BFA treatment occurs independent of the retromer complex (Kleine-Vehn et al., 2008a). This, together with the previous observation that GNOM-mediated basal recycling of PIN proteins also occurs independent of SNX1 (Kleine-Vehn et al., 2008b), indicates that plant PIN proteins do not pass through retromer compartments during their transcytosis or recycling.

Instead, the plant retromer seems to be involved in recruiting PIN proteins from the prevacuolar compartments back to the recycling pathway (Kleine-Vehn et al., 2008b), which might explain the observed enhanced vacuolar accumulation of PIN proteins in *vps29* root cells (Jaillais et al., 2007).

*PID*, *WAG1* and *WAG2* are all expressed predominantly in the root epidermis; a cell layer that bears PIN2 on the apical cell side and PIN1 on the basal cell side. PIN2 localizes to the apical cell side immediately after its non-polar secretion with default *PID*, *WAG1* and *WAG2* amounts, whereas PIN1 does the same only when *PID*, *WAG1* or *WAG2* is overexpressed. Once the level of *PID*, *WAG1* or *WAG2* is increased, the basally localized PIN1 is recruited by the apical recycling pathway for its gradual basal-to-apical transcytosis. These data suggest that PIN2 might be a more favored substrate for these kinases than PIN1. This notion is further supported with the observation that PIN1 is localized to the apical side of the epidermal cells in a *pin2* mutant (Vieten et al., 2005).

### Basal-to-apical PIN transcytosis requires the endocytosis-related Rab5 pathway

By real-time tracking of PINs using green-to-red photoconvertible tag EosFP (Dhonukshe et al., 2007), we directly visualized *PID*-, *WAG1*- and *WAG2*-mediated PIN transcytosis. Impairment of the endocytosis-related Rab5 pathway interfered with *PID*-, *WAG1*- and *WAG2*-induced PIN transcytosis, indicating its involvement in kinase-mediated PIN polarity establishment. Therefore, we conclude that, as a general regulator, the Rab5 pathway not only operates in trafficking of PINs to the basal recycling pathway (Dhonukshe et al., 2008) but also functions in trafficking of phosphorylated PINs to the apical PM.

Previous detailed pulse-chase analysis of the endocytic tracker FM4-64 has determined the localization of Ara7 (a plant homolog of mammalian Rab5) on an early type of endosomes (Ueda et al., 2004), and more recent immunogold electron microscopy results have shown its localization to multivesicular body compartments (Haas et al., 2007). Therefore, the mechanism by which Rab5 pathway impairment leads to reduced endocytosis is unclear. Despite this, the DN-ARA7 provides one of the very few available genetic tools to impair PIN endocytosis, especially when PIN proteins pass through the Ara7-positive endomembrane compartments (P.D. and B.S., unpublished) (Furutani et al., 2007). It will be an important future task to resolve the step-wise trafficking of PINs along the plant endomembrane compartments and the phosphorylation status-based differential sorting stations.

### Mechanism of *PID* and *WAG* kinase action

Our results implicate a role for PM composition in effective PIN polarity regulation by *PID*, *WAG1* and *WAG2*. In the sterol mutant *cpil* the localization of *PID* at the PM was reduced, and *PID*-triggered PIN apicalization was not observed within a 20-hour timeframe. These observations concur with a previous report showing that PIN2 apicalization in the epidermis is slowed down in the *cpil* mutant (Men et al., 2008). This further matches with our finding of the predominant expression of *PID*, *WAG1* and *WAG2* within the root epidermis. Accordingly, the *cpil* mutant shows the gravity defects (Men et al., 2008). In view of the pleiotropic defects of the *cpil* mutant such as strong dwarf phenotypes, we are aware that this might be indirect evidence.

The *cpil* mutant data, together with our tracking results and colocalization analysis, suggest that *PID*, *WAG1* and *WAG2* act on PINs predominantly at the PM. It has been shown before that the prolonged treatment with the GNOM inhibitor BFA induces a

basal-to-apical switch of PIN1 (Kleine-Vehn et al., 2008a) and that, in the *pid* mutant, the BFA-induced PIN apicalization is slower (Kleine-Vehn et al., 2009). As prolonged treatment of BFA is unable to induce basal-to-apical PIN relocation in *pid wag1 wag2*, our results now show the importance of PID, WAG1 and WAG2 in that process, which confirms the redundant action of the three kinases.

Our previous results have shown the mechanism for generation of basal PIN localization (Dhonukshe et al., 2008). The data described here and in the manuscript by Kleine-Vehn and coworkers (Kleine-Vehn et al., 2009) now identify the decisive steps that lead to apical PIN polarity. Newly synthesized PINs arrive at the PM in a non-polar manner, where, upon less efficient or no phosphorylation, they are recruited to the GNOM-dependent basal recycling pathway, leading to basal PIN polarity. Phosphorylation of non-polar or basally localized PINs by the non-polarly PM localized PID or WAG kinases at specific residues enhances PIN affinity for the GNOM-competitive apical recycling pathway. Thus, apical PIN localization is achieved either by non-polar-to-apical or basal-to-apical PIN translocation (Fig. 7U). This now provides further insight into how the apical and basal PIN trafficking pathways in plants are regulated and identifies the WAG kinases as new key regulators that instruct PIN polarity-based auxin fluxes to modify plant development.

#### Acknowledgements

We thank Marcus Grebe, Gerd Jürgens, Thierry Gaude and Marcus Heisler for sending published materials, Christian Luschig, Youfa Cheng and Yunde Zhao for sharing unpublished materials, Gerda Lamers (IBL, Leiden University) and Erik Manders and Ronald Breedijk (SILS, University of Amsterdam) for their assistance with confocal microscopy and Ward de Winter and Werner Helvensteyn (IBL, Leiden University) for their help with tissue culture and technical assistance, respectively. This work was supported by grants from the Chinese Science Council (F.H.), the Research Council for Earth and Life Sciences (C.S.G.-A.; NWO-ALW 813.06.004 to R.O.; NWO-VENI grant to P.D. and J.X.; NWO-Spinoza prize to B.S.) and from the Netherlands Organization for Health Research and Development (NWO-ZON 050-71-023 to R.O.), with financial aid from the Netherlands Organization of Scientific Research (NWO), and by a Human Frontier Science Program fellowship to A.P.M., an EMBO Long-Term Fellowship to K.P., the EMBO Young Investigator Program to J.F., the Odysseus Programme of the Research Foundation-Flanders to J.F. and by a personal fellowship from the Friedrich Ebert Stiftung to J.K.-V. Deposited in PMC for immediate release. This article is freely accessible online from the date of publication.

#### Competing interests statement

The authors declare no competing financial interests.

#### Supplementary material

Supplementary material for this article is available at <http://dev.biologists.org/lookup/suppl/doi:10.1242/dev.052456/-DC1>

#### References

- Abas, L., Benjamins, R., Malenica, N., Paciorek, T., Wisniewska, J., Moulinier-Anzola, J. C., Sieberer, T., Friml, J. and Luschig, C. (2006). Intracellular trafficking and proteolysis of the *Arabidopsis* auxin-efflux facilitator PIN2 are involved in root gravitropism. *Nat. Cell Biol.* **8**, 249-256.
- Axelos, M., Curie, C., Mazzolini, L., Bardet, C. and Lescure, B. (1992). A protocol for transient gene-expression in *Arabidopsis thaliana* protoplasts isolated from cell-suspension cultures. *Plant Physiol. Biochem.* **30**, 123-128.
- Benjamins, R. and Scheres, B. (2008). Auxin: the looping star in plant development. *Annu. Rev. Plant Biol.* **59**, 443-465.
- Benjamins, R., Quint, A., Weijers, D., Hooykaas, P. and Offringa, R. (2001). The PINOID protein kinase regulates organ development in *Arabidopsis* by enhancing polar auxin transport. *Development* **128**, 4057-4067.
- Bennett, S. R. M., Alvarez, J., Bossinger, G. and Smyth, D. R. (1995). Morphogenesis in *pinoid* mutants of *Arabidopsis thaliana*. *Plant J.* **8**, 505-520.
- Casanova, J. E., Breitfeld, P. P., Ross, S. A. and Mostov, K. E. (1990). Phosphorylation of the polymeric immunoglobulin receptor required for its efficient transcytosis. *Science* **248**, 742-745.
- Cheng, Y., Qin, G., Dai, X. and Zhao, Y. (2008). NPY genes and AGC kinases define two key steps in auxin-mediated organogenesis in *Arabidopsis*. *Proc. Natl. Acad. Sci. USA* **105**, 21017-21022.
- Christensen, S. K., Dagenais, N., Chory, J. and Weigel, D. (2000). Regulation of auxin response by the protein kinase PINOID. *Cell* **100**, 469-478.
- Clough, S. J. and Bent, A. F. (1998). Floral dip: a simplified method for *Agrobacterium*-mediated transformation of *Arabidopsis thaliana*. *Plant J.* **16**, 735-743.
- Dhonukshe, P., Baluska, F., Schlicht, M., Hlavacka, A., Samaj, J., Friml, J. and Gadella, T. W., Jr (2006). Endocytosis of cell surface material mediates cell plate formation during plant cytokinesis. *Dev. Cell* **10**, 137-150.
- Dhonukshe, P., Aniento, F., Hwang, I., Robinson, D. G., Mravec, J., Stierhof, Y. D. and Friml, J. (2007). Clathrin-mediated constitutive endocytosis of PIN auxin efflux carriers in *Arabidopsis*. *Curr. Biol.* **17**, 520-527.
- Dhonukshe, P., Tanaka, H., Goh, T., Ebine, K., Mahonen, A. P., Prasad, K., Blilou, I., Geldner, N., Xu, J., Uemura, T. et al. (2008). Generation of cell polarity in plants links endocytosis, auxin distribution and cell fate decisions. *Nature* **456**, 962-966.
- Friml, J., Benkova, E., Blilou, I., Wisniewska, J., Hamann, T., Ljung, K., Woody, S., Sandberg, G., Scheres, B., Jurgens, G. et al. (2002). AtPIN4 mediates sink-driven auxin gradients and root patterning in *Arabidopsis*. *Cell* **108**, 661-673.
- Friml, J., Benkova, E., Mayer, U., Palme, K. and Muster, G. (2003). Automated whole mount localisation techniques for plant seedlings. *Plant J.* **34**, 115-124.
- Friml, J., Yang, X., Michniewicz, M., Weijers, D., Quint, A., Tietz, O., Benjamins, R., Ouwkerk, P. B., Ljung, K., Sandberg, G. et al. (2004). A PINOID-dependent binary switch in apical-basal PIN polar targeting directs auxin efflux. *Science* **306**, 862-865.
- Furutani, M., Kajiwara, T., Kato, T., Trembl, B. S., Stockum, C., Torres-Ruiz, R. A. and Tasaka, M. (2007). The gene *MACCHI-BOU 4/ENHANCER OF PINOID* encodes a NPH3-like protein and reveals similarities between organogenesis and phototropism at the molecular level. *Development* **134**, 3849-3859.
- Geldner, N., Anders, N., Wolters, H., Keicher, J., Kornberger, W., Muller, P., Delbarre, A., Ueda, T., Nakano, A. and Jurgens, G. (2003). The *Arabidopsis* GNOM ARF-GEF mediates endosomal recycling, auxin transport, and auxin-dependent plant growth. *Cell* **112**, 219-230.
- Geldner, N., Richter, S., Vieten, A., Marquardt, S., Torres-Ruiz, R. A., Mayer, U. and Jurgens, G. (2004). Partial loss-of-function alleles reveal a role for GNOM in auxin transport-related, post-embryonic development of *Arabidopsis*. *Development* **131**, 389-400.
- Gleave, A. P. (1992). A versatile binary vector system with a T-DNA organisational structure conducive to efficient integration of cloned DNA into the plant genome. *Plant Mol. Biol.* **20**, 1203-1207.
- Haas, T. J., Sliwinski, M. K., Martinez, D. E., Preuss, M., Ebine, K., Ueda, T., Nielsen, E., Odorizzi, G. and Otegui, M. S. (2007). The *Arabidopsis* AAA ATPase SKD1 is involved in multivesicular endosome function and interacts with its positive regulator LYST-INTERACTING PROTEIN5. *Plant Cell* **19**, 1295-1312.
- Heidstra, R., Welch, D. and Scheres, B. (2004). Mosaic analyses using marked activation and deletion clones dissect *Arabidopsis* SCARECROW action in asymmetric cell division. *Genes Dev.* **18**, 1964-1969.
- Hellens, R. P., Edwards, E. A., Leyland, N. R., Bean, S. and Mullineaux, P. M. (2000). pGreen: a versatile and flexible binary Ti vector for *Agrobacterium*-mediated plant transformation. *Plant Mol. Biol.* **42**, 819-832.
- Huang, F., Zago, M. K., Abas, L., van, M. A., Galvan-Ampudia, C. S. and Offringa, R. (2010). Phosphorylation of conserved PIN motifs directs *Arabidopsis* PIN1 polarity and auxin transport. *Plant Cell* **22**, 1129-1142.
- Jaillais, Y., Fobis-Loisy, I., Miege, C., Rollin, C. and Gaude, T. (2006). AtSNX1 defines an endosome for auxin-carrier trafficking in *Arabidopsis*. *Nature* **443**, 106-109.
- Jaillais, Y., Santambrogio, M., Rozier, F., Fobis-Loisy, I., Miege, C. and Gaude, T. (2007). The retromer protein VPS29 links cell polarity and organ initiation in plants. *Cell* **130**, 1057-1070.
- Kleine-Vehn, J., Dhonukshe, P., Sauer, M., Brewer, P. B., Wisniewska, J., Paciorek, T., Benkova, E. and Friml, J. (2008a). ARF GEF-dependent transcytosis and polar delivery of PIN auxin carriers in *Arabidopsis*. *Curr. Biol.* **18**, 526-531.
- Kleine-Vehn, J., Leitner, J., Zwiewka, M., Sauer, M., Abas, L., Luschig, C. and Friml, J. (2008b). Differential degradation of PIN2 auxin efflux carrier by retromer-dependent vacuolar targeting. *Proc. Natl. Acad. Sci. USA* **105**, 17812-17817.
- Kleine-Vehn, J., Huang, F., Naramoto, S., Zhang, J., Michniewicz, M., Offringa, R. and Friml, J. (2009). PIN auxin efflux carrier polarity is regulated by PINOID kinase-mediated recruitment into GNOM-independent trafficking in *Arabidopsis*. *Plant Cell* **21**, 3839-3849.
- Lazo, G. R., Stein, P. A. and Ludwig, R. A. (1991). A DNA transformation-competent *Arabidopsis* genomic library in *Agrobacterium*. *Biotechnology* **9**, 963-967.
- Lee, M. M. and Schiefelbein, J. (1999). WEREWOLF, a MYB-related protein in *Arabidopsis*, is a position-dependent regulator of epidermal cell patterning. *Cell* **99**, 473-483.



- Luschnig, C., Gaxiola, R. A., Grisafi, P. and Fink, G. R. (1998). EIR1, a root-specific protein involved in auxin transport, is required for gravitropism in *Arabidopsis thaliana*. *Genes Dev.* **12**, 2175-2187.
- Men, S., Boutte, Y., Ikeda, Y., Li, X., Palme, K., Stierhof, Y. D., Hartmann, M. A., Moritz, T. and Grebe, M. (2008). Sterol-dependent endocytosis mediates post-cytokinetic acquisition of PIN2 auxin efflux carrier polarity. *Nat. Cell Biol.* **10**, 237-244.
- Michniewicz, M., Zago, M. K., Abas, L., Weijers, D., Schweighofer, A., Meskiene, I., Heisler, M. G., Ohno, C., Zhang, J., Huang, F. et al. (2007). Antagonistic regulation of PIN phosphorylation by PP2A and PINOID directs auxin flux. *Cell* **130**, 1044-1056.
- Mizoguchi, T., Hayashida, N., Yamaguchi, S. K., Harada, H. and Shinozaki, K. (1992). Nucleotide sequence of a cDNA encoding a protein kinase homologue in *Arabidopsis thaliana*. *Plant Mol. Biol.* **18**, 809-812.
- Muller, A., Guan, C., Galweiler, L., Tanzler, P., Huijser, P., Marchant, A., Parry, G., Bennett, M., Wisman, E. and Palme, K. (1998). AtPIN2 defines a locus of *Arabidopsis* for root gravitropism control. *EMBO J.* **17**, 6903-6911.
- Ottenschlager, I., Wolff, P., Wolverton, C., Bhalerao, R. P., Sandberg, G., Ishikawa, H., Evans, M. and Palme, K. (2003). Gravity-regulated differential auxin transport from columella to lateral root cap cells. *Proc. Natl. Acad. Sci. USA* **100**, 2987-2991.
- Santner, A. A. and Watson, J. C. (2006). The WAG1 and WAG2 protein kinases negatively regulate root waving in *Arabidopsis*. *Plant J.* **45**, 752-764.
- Sorefan, K., Girin, T., Liljegren, S. J., Ljung, K., Robles, P., Galvan-Ampudia, C. S., Offringa, R., Friml, J., Yanofsky, M. F. and Ostergaard, L. (2009). A regulated auxin minimum is required for seed dispersal in *Arabidopsis*. *Nature* **459**, 583-586.
- Steinmann, T., Geldner, N., Grebe, M., Mangold, S., Jackson, C. L., Paris, S., Galweiler, L., Palme, K. and Jurgens, G. (1999). Coordinated polar localization of auxin efflux carrier PIN1 by GNOM ARF GEF. *Science* **286**, 316-318.
- Sukumar, P., Edwards, K. S., Rahman, A., Delong, A. and Muday, G. K. (2009). PINOID kinase regulates root gravitropism through modulation of PIN2-dependent basipetal auxin transport in *Arabidopsis thaliana*. *Plant Physiol.* **150**, 722-735.
- Tanaka, H., Dhonukshe, P., Brewer, P. B. and Friml, J. (2006). Spatiotemporal asymmetric auxin distribution: a means to coordinate plant development. *Cell Mol. Life Sci.* **63**, 2738-2754.
- Treml, B. S., Winderl, S., Radykewicz, R., Herz, M., Schweizer, G., Hutzler, P., Glawischnig, E. and Ruiz, R. A. (2005). The gene *ENHANCER OF PINOID* controls cotyledon development in the *Arabidopsis* embryo. *Development* **132**, 4063-4074.
- Ueda, T., Uemura, T., Sato, M. H. and Nakano, A. (2004). Functional differentiation of endosomes in *Arabidopsis* cells. *Plant J.* **40**, 783-789.
- Van, L. N., Engler, G., Holsters, M., Van den Elsacker, S., Zaenen, I., Schilperoort, R. A. and Schell, J. (1974). Large plasmid in *Agrobacterium tumefaciens* essential for crown gall-inducing ability. *Nature* **252**, 169-170.
- Verges, M., Luton, F., Gruber, C., Tiemann, F., Reinders, L. G., Huang, L., Burlingame, A. L., Haft, C. R. and Mostov, K. E. (2004). The mammalian retromer regulates transcytosis of the polymeric immunoglobulin receptor. *Nat. Cell Biol.* **6**, 763-769.
- Vieten, A., Vanneste, S., Wisniewska, J., Benkova, E., Benjamins, R., Beeckman, T., Luschnig, C. and Friml, J. (2005). Functional redundancy of PIN proteins is accompanied by auxin-dependent cross-regulation of PIN expression. *Development* **132**, 4521-4531.
- Wisniewska, J., Xu, J., Seifertova, D., Brewer, P. B., Ruzicka, K., Blilou, I., Rouquie, D., Benkova, E., Scheres, B. and Friml, J. (2006). Polar PIN localization directs auxin flow in plants. *Science* **312**, 883.
- Xu, J. and Scheres, B. (2005). Dissection of *Arabidopsis* ADP-RIBOSYLATION FACTOR 1 function in epidermal cell polarity. *Plant Cell* **17**, 525-536.
- Xu, J., Hofhuis, H., Heidstra, R., Sauer, M., Friml, J. and Scheres, B. (2006). A molecular framework for plant regeneration. *Science* **311**, 385-388.
- Zourelidou, M., Muller, I., Willige, B. C., Nill, C., Jikumaru, Y., Li, H. and Schwechheimer, C. (2009). The polarly localized D6 PROTEIN KINASE is required for efficient auxin transport in *Arabidopsis thaliana*. *Development* **136**, 627-636.
- Zuo, J., Niu, Q. W. and Chua, N. H. (2000). Technical advance: an estrogen receptor-based transactivator XVE mediates highly inducible gene expression in transgenic plants. *Plant J.* **24**, 265-273.
